# Supplementary material
Source: Springer Nature journal article supplement (https://www.springermedizin.de/resource/supplementary/12865_2009_309_MOESM3_ESM.pdf/9427720)

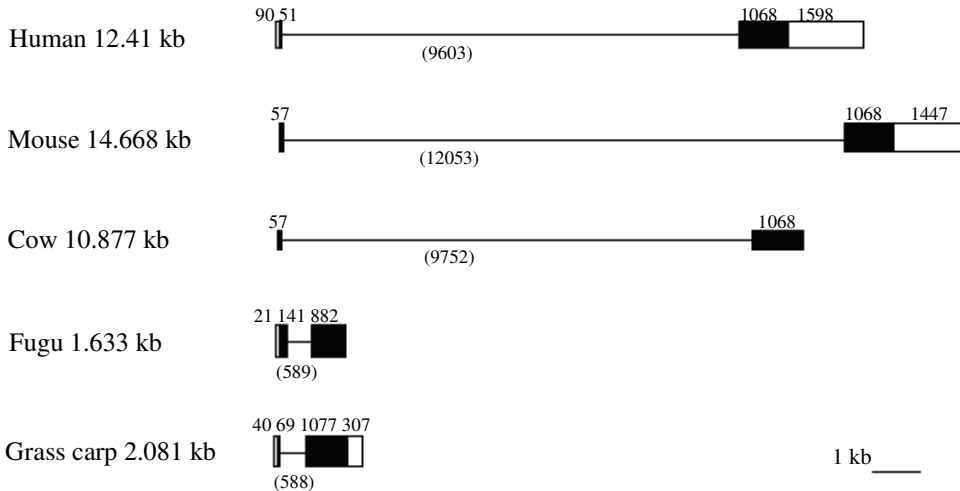

Supplement: MOESM3 [file 9427720]
